# Supplementary material for: Hepatic Resection for Hepatocellular Carcinoma in Nonalcoholic Fatty Liver Disease: A Systematic Review and Meta-Analysis of 7226 Patients
Source: PubMed Central journal article supplement — Ann Surg Open. 2021 May 3;2(2):e065. doi: 10.1097/AS9.0000000000000065 (PMC10455059; doi:10.1097/as9.0000000000000065), 2021-05-03
Supplement: as9-2-e065-s001.pdf [file as9-2-e065-s001.pdf]

## Supplementary Figures and Tables

### Appendix S1

**Supplementary Table 1 - Preferred Reporting Items for Systematic Reviews and Meta-Analyses (PRISMA) checklist.**

| Section/topic             | #  | Prisma Checklist item                                                                                                                                                                                                                                                                                       | Reported on page # |
|---------------------------|----|-------------------------------------------------------------------------------------------------------------------------------------------------------------------------------------------------------------------------------------------------------------------------------------------------------------|--------------------|
| <b>TITLE</b>              |    |                                                                                                                                                                                                                                                                                                             |                    |
| Title                     | 1  | Identify the report as a systematic review, meta-analysis, or both.                                                                                                                                                                                                                                         | 1                  |
| <b>ABSTRACT</b>           |    |                                                                                                                                                                                                                                                                                                             |                    |
| Structured summary        | 2  | Provide a structured summary including, as applicable: background; objectives; data sources; study eligibility criteria, participants, and interventions; study appraisal and synthesis methods; results; limitations; conclusions and implications of key findings; systematic review registration number. | 3                  |
| <b>INTRODUCTION</b>       |    |                                                                                                                                                                                                                                                                                                             |                    |
| Rationale                 | 3  | Describe the rationale for the review in the context of what is already known.                                                                                                                                                                                                                              | 5                  |
| Objectives                | 4  | Provide an explicit statement of questions being addressed with reference to participants, interventions, comparisons, outcomes, and study design (PICOS).                                                                                                                                                  | 6                  |
| <b>METHODS</b>            |    |                                                                                                                                                                                                                                                                                                             |                    |
| Protocol and registration | 5  | Indicate if a review protocol exists, if and where it can be accessed (e.g., Web address), and, if available, provide registration information including registration number.                                                                                                                               | 7                  |
| Eligibility criteria      | 6  | Specify study characteristics (e.g., PICOS, length of follow-up) and report characteristics (e.g., years considered, language, publication status) used as criteria for eligibility, giving rationale.                                                                                                      | 7                  |
| Information sources       | 7  | Describe all information sources (e.g., databases with dates of coverage, contact with study authors to identify additional studies) in the search and date last searched.                                                                                                                                  | 7                  |
| Search                    | 8  | Present full electronic search strategy for at least one database, including any limits used, such that it could be repeated.                                                                                                                                                                               | 7                  |
| Study selection           | 9  | State the process for selecting studies (i.e., screening, eligibility, included in systematic review, and, if applicable, included in the meta-analysis).                                                                                                                                                   | 8                  |
| Data collection process   | 10 | Describe method of data extraction from reports (e.g., piloted forms, independently, in duplicate) and any processes for obtaining and confirming data from investigators.                                                                                                                                  | 9                  |

|                                    |    |                                                                                                                                                                                                                        |      |
|------------------------------------|----|------------------------------------------------------------------------------------------------------------------------------------------------------------------------------------------------------------------------|------|
| Data items                         | 11 | List and define all variables for which data were sought (e.g., PICOS, funding sources) and any assumptions and simplifications made.                                                                                  | 9    |
| Risk of bias in individual studies | 12 | Describe methods used for assessing risk of bias of individual studies (including specification of whether this was done at the study or outcome level), and how this information is to be used in any data synthesis. | 9-10 |
| Summary measures                   | 13 | State the principal summary measures (e.g., risk ratio, difference in means).                                                                                                                                          | 11   |
| Synthesis of results               | 14 | Describe the methods of handling data and combining results of studies, if done, including measures of consistency (e.g., I <sup>2</sup> ) for each meta-analysis.                                                     | 11   |

| Section/topic                 | #  | Checklist item                                                                                                                                                                                           | Reported on page # |
|-------------------------------|----|----------------------------------------------------------------------------------------------------------------------------------------------------------------------------------------------------------|--------------------|
| Risk of bias across studies   | 15 | Specify any assessment of risk of bias that may affect the cumulative evidence (e.g., publication bias, selective reporting within studies).                                                             | 9-10               |
| Additional analyses           | 16 | Describe methods of additional analyses (e.g., sensitivity or subgroup analyses, meta-regression), if done, indicating which were pre-specified.                                                         | 11                 |
| <b>RESULTS</b>                |    |                                                                                                                                                                                                          |                    |
| Study selection               | 17 | Give numbers of studies screened, assessed for eligibility, and included in the review, with reasons for exclusions at each stage, ideally with a flow diagram.                                          | 12                 |
| Study characteristics         | 18 | For each study, present characteristics for which data were extracted (e.g., study size, PICOS, follow-up period) and provide the citations.                                                             | 12                 |
| Risk of bias within studies   | 19 | Present data on risk of bias of each study and, if available, any outcome level assessment (see item 12).                                                                                                | 12-13              |
| Results of individual studies | 20 | For all outcomes considered (benefits or harms), present, for each study: (a) simple summary data for each intervention group (b) effect estimates and confidence intervals, ideally with a forest plot. | 13                 |
| Synthesis of results          | 21 | Present results of each meta-analysis done, including confidence intervals and measures of consistency.                                                                                                  | 13-14              |
| Risk of bias across studies   | 22 | Present results of any assessment of risk of bias across studies (see Item 15).                                                                                                                          | 12                 |
| Additional analysis           | 23 | Give results of additional analyses, if done (e.g., sensitivity or subgroup analyses, meta-regression [see Item 16]).                                                                                    | 14                 |
| <b>DISCUSSION</b>             |    |                                                                                                                                                                                                          |                    |
| Summary of evidence           | 24 | Summarize the main findings including the strength of evidence for each main outcome; consider their relevance to key groups (e.g., healthcare providers, users, and policy makers).                     | 14                 |

|                |    |                                                                                                                                                               |   |
|----------------|----|---------------------------------------------------------------------------------------------------------------------------------------------------------------|---|
| Limitations    | 25 | Discuss limitations at study and outcome level (e.g., risk of bias), and at review-level (e.g., incomplete retrieval of identified research, reporting bias). |   |
| Conclusions    | 26 | Provide a general interpretation of the results in the context of other evidence, and implications for future research.                                       |   |
| <b>FUNDING</b> |    |                                                                                                                                                               |   |
| Funding        | 27 | Describe sources of funding for the systematic review and other support (e.g., supply of data); role of funders for the systematic review.                    | 1 |

## Appendix S2

**Supplementary Table 2 - MOOSE Statement - Reporting Checklist for Authors, Editors, and Reviewers of Meta-analyses of Observational Studies**

| Reporting Criteria                                                                                               | Reported (Yes/No) | Reported on Page                                                                                                                                                                                                       |
|------------------------------------------------------------------------------------------------------------------|-------------------|------------------------------------------------------------------------------------------------------------------------------------------------------------------------------------------------------------------------|
| <b>Reporting of Background</b>                                                                                   | Yes               | See Introduction- pp 6-7                                                                                                                                                                                               |
| Problem definition                                                                                               | Yes               | See Introduction- p 7                                                                                                                                                                                                  |
| Hypothesis statement                                                                                             | Yes               | See Introduction- p 7                                                                                                                                                                                                  |
| Description of Study Outcome(s)                                                                                  | Yes               | See Introduction- p 7                                                                                                                                                                                                  |
| Type of exposure or intervention used                                                                            | Yes               | See Material and methods- pp 7-8                                                                                                                                                                                       |
| Type of study design used                                                                                        | Yes               | See Material and methods- pp 7-8                                                                                                                                                                                       |
| Study population                                                                                                 | Yes               | See Material and methods – pp 7-8                                                                                                                                                                                      |
| <b>Reporting of Search Strategy</b>                                                                              |                   |                                                                                                                                                                                                                        |
| Qualifications of searchers (e.g. librarians and investigators)                                                  | Yes               | See Material and methods- Data sources and searches- pp 8-9                                                                                                                                                            |
| Search strategy, including time period included in the synthesis and keywords                                    | Yes               | See Material and methods- Data sources and searches- pp 8-9                                                                                                                                                            |
| Effort to include all available studies, including contact with authors                                          | Yes               | See Material and methods- Data sources and searches- pp 8-9                                                                                                                                                            |
| Databases and registries searched                                                                                | Yes               | See Material and methods- Data sources and searches- p 8-9                                                                                                                                                             |
| Search software used, name and version, including special features used (e.g. explosion)                         | Yes               | See Material and methods- Data sources and searches- p 9-10                                                                                                                                                            |
| Use of hand searching (e.g. reference lists of obtained articles)                                                | Yes               | See Material and methods- Data sources and searches- p 9-10                                                                                                                                                            |
| List of citations located and those excluded, including justification                                            | Yes               | See Flow-chart Figure 1<br>Reference to Figure 1 at Page 15                                                                                                                                                            |
| Method for addressing articles published in languages other than English                                         | No                | Articles published in non-English languages were not searched-<br>Explanation of why we did not include studies in non-English languages is reported in the Methods at page 8 in the section Data Sources and Searches |
| Method of handling abstracts and unpublished studies                                                             | Yes               | Gray literature was searched but no abstracts or manuscripts were identified –<br><br>More details about gray literature is reported in the section of Material and methods Data Sources and searches- see pp 8-9      |
| Description of any contact with authors                                                                          | No                | No attempts to contact authors for individual patient data. This is explained in the Methods, in the section Data Sources and Searches at page 8                                                                       |
| <b>Reporting of Methods</b>                                                                                      |                   |                                                                                                                                                                                                                        |
| Description of relevance or appropriateness of studies assembled for assessing the hypothesis to be tested       | Yes               | See Material and methods- Study characteristics- p 10 and Table 1                                                                                                                                                      |
| Rationale for the selection and coding of data (e.g. sound clinical principles or convenience)                   | Yes               | See Material and methods- Summary statistics- p 11                                                                                                                                                                     |
| Documentation of how data were classified and coded (e.g. multiple raters, blinding, and interrater reliability) | Yes               | See Methods- Assessment of Bias p 11                                                                                                                                                                                   |
| Assessment of confounding (e.g.                                                                                  | Yes               | See Data sources and Searches at pp 8-9                                                                                                                                                                                |

|                                                                                                                                                                                                                                                                               |     |                                                                                                                                                                                                                          |
|-------------------------------------------------------------------------------------------------------------------------------------------------------------------------------------------------------------------------------------------------------------------------------|-----|--------------------------------------------------------------------------------------------------------------------------------------------------------------------------------------------------------------------------|
| comparability of cases and controls in studies where appropriate                                                                                                                                                                                                              |     |                                                                                                                                                                                                                          |
| Assessment of study quality, including blinding of quality assessors. stratification or regression on possible predictors of study results YES 5                                                                                                                              | Yes | See Assessment of Bias, pp 11<br>See Study Characteristics at p 16<br>See meta-regression at p 19                                                                                                                        |
| Assessment of heterogeneity                                                                                                                                                                                                                                                   | Yes | See Meta-regression and other sensitivity analyses at p 19                                                                                                                                                               |
| Description of statistical methods (e.g. complete description of fixed or random effects models, justification of whether the chosen models account for predictors of study results, dose-response models, or cumulative meta-analysis) in sufficient detail to be replicated | Yes | See methods section summary statistics at p 13, See Data Synthesis at p 14                                                                                                                                               |
| Provision of appropriate tables and graphics                                                                                                                                                                                                                                  | Yes | Results- p 16, Table 1.<br>Results- p 16, Table 2.<br>Results- p 16, Table 3.<br>Results- p 17, Table 4.<br>Results- p 17, Figure 2A<br>Results- p 17, Figure 2B<br>Results- p 18, Figure 3A<br>Results- p 18, Figure 3B |
| <b>Reporting of Results</b>                                                                                                                                                                                                                                                   |     |                                                                                                                                                                                                                          |
| Table giving descriptive information for each study included                                                                                                                                                                                                                  | Yes | Results- p 16, Table 2<br>Results- p 16, Table 3                                                                                                                                                                         |
| Results of sensitivity testing (e.g. subgroup analysis)                                                                                                                                                                                                                       | Yes | Results- p 19, Meta-regression and sensitivity analysis- pp 19-20                                                                                                                                                        |
| Indication of statistical uncertainty of findings                                                                                                                                                                                                                             | yes | Results- pp17-20<br>Discussion pp 19-20                                                                                                                                                                                  |
| <b>Reporting of Discussion</b>                                                                                                                                                                                                                                                |     |                                                                                                                                                                                                                          |
| Quantitative assessment of bias (e.g., publication bias)                                                                                                                                                                                                                      | Yes | Methods- Assessment of bias- p 11                                                                                                                                                                                        |
| Justification for exclusion (e.g. exclusion of non-English-language citations)                                                                                                                                                                                                | Yes | Methods- Data sources and searches- p 8                                                                                                                                                                                  |
| Assessment of quality of included studies                                                                                                                                                                                                                                     | Yes | Discussion- p 22                                                                                                                                                                                                         |
| <b>Reporting of Conclusions</b>                                                                                                                                                                                                                                               |     |                                                                                                                                                                                                                          |
| Consideration of alternative explanations for observed results                                                                                                                                                                                                                | Yes | Discussion- pp 20-22                                                                                                                                                                                                     |
| Generalization of the conclusions (i.e. appropriate for the data presented and within the domain of the literature review)                                                                                                                                                    | Yes | Discussion- pp 22-26                                                                                                                                                                                                     |
| Guidelines for future research                                                                                                                                                                                                                                                | Yes | Discussion- pp 26-28                                                                                                                                                                                                     |
| Disclosure of funding source                                                                                                                                                                                                                                                  | Yes | Funding sources – p 29                                                                                                                                                                                                   |

## Appendix S3

**Supplementary Table 3** Example of The Newcastle-Ottawa Scale (NOS) for grading the quality of studies included in this meta-analysis. A study can be awarded a maximum of one star for each numbered item within the Selection and Exposure categories. A maximum of two stars can be given for Comparability.

### Selection (First Domain)

#### 1) Is the case definition adequate?

- a) yes, with independent validation \*
- b) yes, e.g. record linkage or based on self-reports
- c) no description

#### 2) Representativeness of the cases

- a) consecutive or obviously representative series of cases \*
- b) potential for selection biases or not stated

#### 3) Selection of Controls

- a) community controls \*
- b) hospital controls
- c) no description

#### 4) Definition of Controls

- a) no history of disease (endpoint) \*
- b) no description of source Comparability

### Comparability (Second Domain)

#### 1) Comparability of cases and controls based on the design or analysis

- a) study controls for \_\_\_\_\_ (Select the most important factor.) \*
- b) study controls for any additional factor \* (This criterion could be modified to indicate specific control for a second important factor.)

### Exposure (Third Domain)

#### 1) Ascertainment of exposure

- a) secure record (e.g. surgical records) \*
- b) structured interview where blind to case/control status \*
- c) interview not blinded to case/control status
- d) written self-report or medical record only
- e) no description

2) Same method of ascertainment for cases and controls

- a) yes \*
- b) no

3) Non-Response rate

- a) same rate for both groups \*
- b) non respondents described
- c) rate different and no designation

## Supplementary Table 4.

### Characteristics of the included studies

| Authors<br>(Reference) | Publication Year | Country       | Study Design | Timeframe | Total N.<br>Patients | NAFLD(+)    | NAFLD(-)    | Median or<br>Mean Follow-<br>up (Months) | Reported<br>Outcomes |
|------------------------|------------------|---------------|--------------|-----------|----------------------|-------------|-------------|------------------------------------------|----------------------|
|                        |                  |               |              |           |                      | N. Patients | N. Patients |                                          |                      |
| Wakai [30]             | 2011             | Japan         | RCC          | 1990-2007 | 225                  | 17          | 208         | 87                                       | OS and DFS           |
| Wu [28]                | 2011             | Taiwan        | RCC          | 1999-2005 | 1,048                | 355         | 693         | 53.1                                     | OS                   |
| Ishizuka [24]          | 2013             | Japan         | RCC          | 2000-2008 | 377                  | 40          | 337         | 27.3                                     | OS and DFS           |
| Cauchy [25]            | 2013             | France        | RCC          | 2000-2011 | 62                   | 38          | 24          | 24                                       | OS                   |
| Nishio [33]            | 2015             | Japan         | RCC          | 2000-2011 | 456                  | 19          | 437         | 75.4                                     | OS and DFS           |
| Vigano [31]            | 2015             | Italy         | RCC          | 2000-2012 | 192                  | 96          | 96          | 44.6                                     | OS and DFS           |
| Mikuriya [34]          | 2015             | Japan         | RCC          | 1998-2011 | 666                  | 21          | 645         | -                                        | OS and DFS           |
| Su [23]                | 2015             | Taiwan        | RCC          | 1991-2006 | 188                  | 74          | 114         | 69.8                                     | OS                   |
| Tian [32]              | 2017             | China         | RCC          | 2009-2012 | 1,235                | 81          | 1154        | 40.2                                     | OS and DFS           |
| Kimura [37]            | 2017             | Japan         | RCC          | 1996-2012 | 77                   | 30          | 47          | -                                        | OS and DFS           |
| Wong [29]              | 2017             | United States | RCC          | 1991-2011 | 866                  | 179         | 687         | -                                        | OS                   |
| Pais [26]              | 2017             | France        | RCC          | 1995-2014 | 323                  | 39          | 284         | -                                        | DFS                  |
| Liang [35]             | 2019             | Japan         | RCC          | 2002-2015 | 177                  | 75          | 102         | 52                                       | OS and DFS           |
| Koh [36]               | 2019             | Singapore     | RCC          | 2000-2015 | 996                  | 152         | 844         | -                                        | OS and DFS           |
| Yoon [27]              | 2020             | South Korea   | RCC          | 2009-2013 | 338                  | 196         | 142         | 72.3                                     | OS and DFS           |
| Total N. Patients      |                  |               |              |           | 7,226                | 1,412       | 5,814       |                                          |                      |

**Legend:** Retrospective Cohort (RCC); Overall Survival (OS); Disease Free Survival (DFS)





## Appendix S4

**Supplementary Table 5.** Quality assessment of the included studies based on the Newcastle-Ottawa Scale (NOS) for non-randomized studies. The quality of each study was judged on three domains: the selection of the study groups, the comparability of the groups, and the ascertainment of the outcome of interest. The NOS assigns up to a maximum of nine stars (points) for the least risk of bias. A study can be awarded a maximum of one star for each item within the selection and exposure categories. A maximum of two stars can be awarded for comparability of cases and controls. Studies with seven or more stars are categorized as good quality, five to six stars indicate fair quality, and four or fewer stars indicate poor quality.

| Primary Author | Adequate definition of cases | Representativeness of cases | Selection of control | Definition of control | Comparability of cases and controls | Exposure assessment | Same method of ascertainment for cases and controls | Nonresponsive rate | Total quality score |
|----------------|------------------------------|-----------------------------|----------------------|-----------------------|-------------------------------------|---------------------|-----------------------------------------------------|--------------------|---------------------|
| Wakai          | ★                            | ★                           | ★                    | ★                     | ★★                                  | ★                   | ★                                                   |                    | 8                   |
| Wu             | ★                            | ★                           | ★                    | ★                     | ★                                   | ★                   | ★                                                   |                    | 7                   |
| Ishizuka       | ★                            | ★                           | ★                    | ★                     | ★                                   | ★                   | ★                                                   |                    | 7                   |
| Cauchy         | ★                            | ★                           | ★                    | ★                     | ★                                   | ★                   | ★                                                   | ★                  | 8                   |
| Nishio         | ★                            | ★                           | ★                    | ★                     | ★                                   | ★                   | ★                                                   |                    | 7                   |
| Vigano         | ★                            | ★                           | ★                    | ★                     | ★★                                  | ★                   | ★                                                   |                    | 8                   |
| Mikuriya       | ★                            | ★                           | ★                    | ★                     | ★★                                  | ★                   | ★                                                   | ★                  | 9                   |
| Su             | ★                            | ★                           | ★                    | ★                     | ★                                   | ★                   | ★                                                   |                    | 7                   |
| Tian           | ★                            | ★                           | ★                    | ★                     | ★★                                  | ★                   | ★                                                   | ★                  | 9                   |
| Kimura         | ★                            | ★                           | ★                    | ★                     | ★★                                  | ★                   | ★                                                   |                    | 8                   |
| Wong           | ★                            | ★                           | ★                    | ★                     | ★                                   | ★                   | ★                                                   | ★                  | 8                   |
| Pais           | ★                            | ★                           | ★                    | ★                     | ★★                                  | ★                   | ★                                                   |                    | 8                   |
| Liang          | ★                            | ★                           | ★                    | ★                     | ★★                                  | ★                   | ★                                                   |                    | 8                   |
| Koh            | ★                            | ★                           | ★                    | ★                     | ★★                                  | ★                   | ★                                                   |                    | 8                   |
| Yoon           | ★                            | ★                           | ★                    | ★                     | ★★                                  | ★                   | ★                                                   | ★                  | 9                   |

## Appendix S5

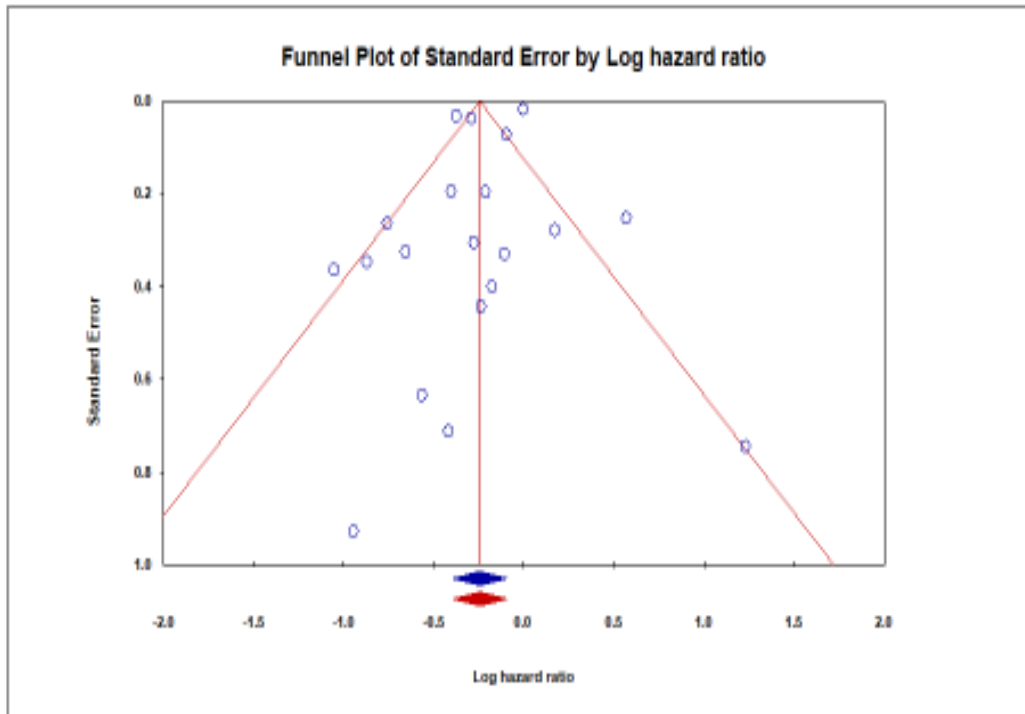

**Supplementary Figure 1S.** Funnel plot illustrating each study's effect with reference to their sample size. There was a symmetric distribution of the plot indicating a low risk of publication bias (Egger's regression;  $P=0.23$ ).

**Supplementary Table 6** Clinical characteristics and tumor characteristics of patients treated with hepatic resection for hepatocellular carcinoma stratified by the presence or absence of non-alcoholic fatty liver disease as a predisposing factor for the development of the tumor.

| Author<br>s<br>(Reference) | Frequency of<br>Follow-up after<br>Hepatic<br>Resection | Treatment of<br>Recurrent<br>Disease                                      | N of<br>patient<br>s<br>(Diagnosis) | NAFLD(+)                            |                                                          |                                |                                                |                                   | NAFLD(-)                                                   |                                        |                                                             |                                |                                          |                                   |
|----------------------------|---------------------------------------------------------|---------------------------------------------------------------------------|-------------------------------------|-------------------------------------|----------------------------------------------------------|--------------------------------|------------------------------------------------|-----------------------------------|------------------------------------------------------------|----------------------------------------|-------------------------------------------------------------|--------------------------------|------------------------------------------|-----------------------------------|
|                            |                                                         |                                                                           |                                     | Median or<br>Mean<br>Age<br>(Years) | Median or<br>Mean<br>Size of<br>largest<br>Tumor<br>(mm) | Patients with<br>Cirrhosis (%) | Median or<br>Mean<br>AFP<br>(ng/mL)            | Perioperative<br>Mortality<br>(%) | N of<br>patients<br>(Diagnoses)                            | Median<br>or<br>Mean<br>Age<br>(Years) | Median<br>or<br>Mean<br>Size of<br>Largest<br>Tumor<br>(mm) | Patients with<br>Cirrhosis (%) | Median<br>or<br>Mean<br>AFP<br>(ng/mL)   | Perioperative<br>Mortality<br>(%) |
| Wakai                      | 3<br>months                                             | -                                                                         | 17                                  | ≤65<br>(n. 4<br>pts)                | ≤50<br>(n. 9<br>pts)                                     | 75                             | ≤20<br>(n. 9<br>pts)                           | 12                                | 147<br>(HCV+)                                              | ≤65 (n.<br>63 pts)                     | ≤50 (n.<br>122<br>pts)                                      | -                              | ≤20 (n.<br>64 pts)                       | 0.7                               |
|                            |                                                         |                                                                           |                                     | >65<br>(n. 13<br>pts)               | >50<br>(n. 8<br>pts)                                     |                                | >20<br>(n. 8<br>pts)                           |                                   |                                                            | >65 (n.<br>84 pts)                     | >50 (n.<br>25 pts)                                          |                                | >20 (n.<br>83 pts)                       |                                   |
| Wu                         | 3<br>months                                             | Re-<br>resection<br>or Ablation<br>or TACE or<br>Systemic<br>Chemotherapy | 355                                 | 57.4                                | 46.1<br>(34.0)                                           | 58.6                           | 27                                             | 4.5                               | 438<br>(HBV+)<br>202<br>(HBV+)<br>53 (Other<br>Conditions) | ≤65 (n.<br>47 pts)                     | ≤50 (n.<br>40 pts)                                          | -                              | ≤20 (n.<br>22 pts)                       | 3.3                               |
|                            |                                                         |                                                                           |                                     |                                     |                                                          |                                |                                                |                                   |                                                            | >65 (n.<br>14 pts)                     | >50 (n.<br>21 pts)                                          |                                | >20 (n.<br>39 pts)                       |                                   |
| Ishizuka                   | -                                                       | -                                                                         | 40                                  | 66                                  | ≤20<br>(n. pts<br>5) >20<br>(n. pts<br>35)               | 32.5                           | 1,030                                          | -                                 | 337<br>(HBV+/HCV+)                                         | 65                                     | ≤20 (n.<br>pts<br>119)<br>>20 (n.<br>pts<br>218)            | 62                             | 9,330                                    | -                                 |
| Cauchy                     | -                                                       | -                                                                         | 38                                  | 68                                  | 71                                                       | 26.3                           | ≤10<br>(n. 27<br>pts)<br>>10<br>(n. 11<br>pts) | 18                                | 24<br>(Normal<br>liver)                                    | 72                                     | 94                                                          | 45.8                           | ≤10 (n.<br>14 pts)<br>>10 (n.<br>10 pts) | 0                                 |
| Nishio                     | -                                                       | -                                                                         | 19                                  | 69                                  | 52                                                       | 10.5                           | 420.8                                          | -                                 | 373<br>(HCV+/HBV+)                                         | 69                                     | 48                                                          | 41.8                           | 12,133                                   | -                                 |

|          |          |                                                           |                                             |     |                                    |      |                                    |                           |                                    |    |                                      |      |                                    |     |
|----------|----------|-----------------------------------------------------------|---------------------------------------------|-----|------------------------------------|------|------------------------------------|---------------------------|------------------------------------|----|--------------------------------------|------|------------------------------------|-----|
|          |          |                                                           |                                             |     |                                    |      |                                    |                           | 43 (ETOH)                          | 68 | 55                                   | 30.2 | 4,984                              | -   |
|          |          |                                                           |                                             |     |                                    |      |                                    |                           | 21 (Cryptogenic)                   | 62 | 97                                   | 19.1 | 11,400                             | -   |
| Vigano   | -        | Re-resection or Ablation or TACE or Liver Transplantation | 96                                          | 71  | ≤50 (n. 48 pts)<br>>50 (n. 48 pts) | 22.9 | ≤10 (n. 40 pts)<br>>10 (n. 52 pts) | 1                         | 96 (HCV+)                          | 69 | ≤50 (n. 48 pts)<br>>50 (n. 48 pts)   | 22.9 | ≤10 (n. 51 pts)<br>>10 (n. 42 pts) | 3   |
| Mikuriya | -        | -                                                         | 21                                          | 69  | 47.2                               | -    | 2,906                              | 0                         | 645 (HCV+)                         | 66 | 33.7                                 | -    | 1,632                              | 0   |
| Su       | 3 months | -                                                         | 7 (Non viral cirrhosis) 55 (HBV+) 12 (HCV+) | 60  | 25                                 | 58.1 | 38.4                               | -                         | 82 (HBV+) 28 (HCV+) 4 (Other)      | 62 | 25                                   | 59.6 | 15.9                               | -   |
| Tian     | -        | -                                                         |                                             | 52  | ≤50 (n. 6 pts)<br>>50 (n. 75 pts)  | 51.8 | -                                  | 2.4                       | 1,154 (HBV+)                       | 50 | ≤50 (n. 473 pts)<br>>50 (n. 681 pts) | 78.7 | -                                  | 2.1 |
| Kimura   | -        | -                                                         |                                             | 30  | 71                                 | 41   | 63                                 | -                         | 31 (ETOH)                          | 69 | 25                                   | 84   | -                                  | -   |
| Won      | -        | -                                                         |                                             | 179 | -                                  | -    | -                                  | -                         | 16 (Cryptogenic)                   | 75 | 67                                   | 25   | -                                  | -   |
| Pais     | -        | -                                                         |                                             | 39  | 70                                 | 87   | 37                                 | 27                        | 215 (HBV+)                         |    |                                      |      |                                    |     |
| Liang    | -        | -                                                         |                                             | 75  | 73                                 | 48   | 12                                 | 7                         | 413 (HCV+)                         |    |                                      |      |                                    |     |
| Koh      | 3 months | -                                                         |                                             | 152 | 69                                 | 7    | 34.2                               | <200 (n. 119 pts)<br>200- | 59 (ETOH)                          |    |                                      |      |                                    |     |
|          |          |                                                           |                                             |     |                                    |      |                                    |                           | 74 (HBV+)                          | 51 |                                      | 72   |                                    |     |
|          |          |                                                           |                                             |     |                                    |      |                                    |                           | 85 (HCV+)                          | 61 | 62                                   | 93   | 38                                 | -   |
|          |          |                                                           |                                             |     |                                    |      |                                    |                           | 31 (ETOH)                          | 64 |                                      | 84   |                                    |     |
|          |          |                                                           |                                             |     |                                    |      |                                    |                           | 23 (HBV+)                          |    |                                      |      |                                    |     |
|          |          |                                                           |                                             |     |                                    |      |                                    |                           | 51 (HCV+)                          | 73 | 34                                   | 48   | 14                                 | -   |
|          |          |                                                           |                                             |     |                                    |      |                                    |                           | 28 (ETOH)                          |    |                                      |      |                                    |     |
|          |          |                                                           |                                             |     |                                    |      |                                    |                           | 844 (HBV+ or HCV+ or other causes) | 63 | 40                                   | 51.1 | <200 (n. 583 pts)<br>200-400 (n.   |     |

|      |             |   |                               |    |    |   |                                                |   |                           |    |    |   |                                    |   |
|------|-------------|---|-------------------------------|----|----|---|------------------------------------------------|---|---------------------------|----|----|---|------------------------------------|---|
|      |             |   |                               |    |    |   | 400<br>(n. 4<br>pts)<br>>400<br>(n. 29<br>pts) |   |                           |    |    |   | 24 pts)<br>>400<br>(n. 237<br>pts) |   |
| Yoon | 3<br>months | - | 196<br>NAFLD<br>+ and<br>HBV+ | 55 | 30 | - | 11.9                                           | - | 142<br>NAFLD-<br>and HBV+ | 57 | 40 | - | 24.2                               | - |

Legend: Non-alcoholic fatty liver disease (NAFLD), Trans-arterial chemoembolization (TACE), Viral Hepatitis B (HBV), Viral Hepatitis C (HCV), Alcohol Induced Liver Disease (ETOH), Alpha Feto-Protein (AFP)

**Legend:** Non-alcoholic fatty liver disease (NAFLD), Trans-arterial chemoembolization (TACE), Viral Hepatitis B (HBV), Viral Hepatitis C (HCV), Alcohol Induced Liver Disease (ETOH), Alpha Feto-Protein (AFP)

## Appendix S6

**Supplementary Table 7.** Disease free survival of patients with nonalcoholic fatty liver disease (NAFLD+) in comparison to patients without nonalcoholic fatty liver disease (NAFLD-) after radical hepatic resections for hepatocellular carcinoma (HCC).

| Authors  | Comparison Groups |     |                    | Disease Free Survival |          |            |          |            |          |
|----------|-------------------|-----|--------------------|-----------------------|----------|------------|----------|------------|----------|
|          |                   |     |                    | 1-year (%)            |          | 3-year (%) |          | 5-year (%) |          |
|          |                   |     |                    | NAFLD(+)              | NAFLD(-) | NAFLD(+)   | NAFLD(-) | NAFLD(+)   | NAFLD(-) |
| Wu       | NAFLD(+)          | vs. | HBV(+)/HCV(+)      | 71.4                  | 59.3     | 45.6       | 39.6     | 33.5       | 32.6     |
| Wakai    | NAFLD(+)          | vs. | HBV(+)             | 80.2                  | 69.0     | 65.7       | 51.5     | 66.0       | 39.0     |
| Wakai    | NAFLD(+)          | vs. | HCV(+)             | 80.2                  | 69.0     | 65.7       | 39.4     | 66.0       | 29.0     |
| Ishizuka | NAFLD(+)          | vs. | HBV(+)/HCV(+)      | 71.8                  | 65.2     | 45.0       | 29.3     | 24.4       | 19.6     |
| Vigano   | NAFLD(+)          | vs. | HCV(+)             | 76.0                  | 73.5     | 56.9       | 39.3     | 37.0       | 27.5     |
| Nishio   | NAFLD(+)          | vs. | HBV(+)/HCV(+)      | 81.3                  | 68.3     | 62.5       | 38.6     | 62.5       | 28.2     |
| Nishio   | NAFLD(+)          | vs. | Cryptogenic        | 81.3                  | 64.0     | 62.5       | 30.1     | 62.5       | 28.1     |
| Nishio   | NAFLD(+)          | vs. | ETOH               | 81.3                  | 63.8     | 62.5       | 32.3     | 62.5       | 17.4     |
| Mikuriya | NAFLD(+)          | vs. | HCV(+)             | 80.1                  | 70.4     | 29.1       | 39.5     | 29.2       | 26.1     |
| Tian     | NAFLD(+)          | vs. | HBV(+)             | 95.1                  | 76.1     | 72.8       | 52.5     | 53.1       | 39.8     |
| Kimura   | NAFLD(+)          | vs. | Cryptogenic        | 76.8                  | 68.8     | 42.3       | 44.2     | 42.3       | 44.2     |
| Kimura   | NAFLD(+)          | vs. | ETOH               | 76.8                  | 77.1     | 42.3       | 43.3     | 42.3       | 29.2     |
| Koh      | NAFLD(+)          | vs. | NAFLD(-)           | 78.0                  | 74.5     | 60.9       | 51.2     | 45.4       | 40.8     |
| Liang    | NAFLD(+)          | vs. | HBV(+)/HCV(+)/ETOH | 80.8                  | 69.0     | 58.0       | 34.8     | 50.9       | 25.1     |
| Yoon     | NAFLD(+)          | vs. | NAFLD(-)           | 85.7                  | 75.6     | 65.3       | 54.9     | 52.8       | 46.9     |

**Legend:** Nonalcoholic fatty liver disease (NAFLD), Viral hepatitis B (HBV), Viral hepatitis C (HCV), alcoholic liver disease (ETOH).

## Appendix S7

**Supplementary Table 8.** Overall survival of patients with nonalcoholic fatty liver disease (NAFLD+) in comparison to patients without nonalcoholic fatty liver disease (NAFLD-) after radical hepatic resections for hepatocellular carcinoma (HCC).

| Authors<br>(Reference) | Comparison Groups                   | Overall Survival    |          |                     |          |                     |          |
|------------------------|-------------------------------------|---------------------|----------|---------------------|----------|---------------------|----------|
|                        |                                     | 1-year survival (%) |          | 3-year survival (%) |          | 5-year Survival (%) |          |
|                        |                                     | NAFLD(+)            | NAFLD(-) | NAFLD(+)            | NAFLD(-) | NAFLD(+)            | NAFLD(-) |
| Wu                     | NAFLD(+) vs. HBV(+) / HCV(+)        | 88.6                | 83.2     | 71.7                | 60.8     | 61.6                | 49.8     |
| Wakai                  | NAFLD(+) vs. HBV(+)                 | 92.8                | 90.6     | 70.2                | 72.7     | 59.0                | 63.0     |
| Wakai                  | NAFLD(+) vs. HCV(+)                 | 92.8                | 93.5     | 64.0                | 74.4     | 59.0                | 57.0     |
| Cauchy                 | NAFLD(+) vs. NAFLD(-)               | 78.0                | 90.0     | 64.0                | 90.0     | -                   | -        |
| Ishizuka               | NAFLD(+) vs. HBV(+) / HCV(+)        | 86.2                | 88.7     | 75.1                | 69.3     | 53.7                | 51.2     |
| Vigano                 | NAFLD(+) vs. HCV(+)                 | 96.8                | 96.9     | 81.3                | 73.0     | 65.6                | 61.4     |
| Nishio                 | NAFLD(+) vs. HBV(+) / HCV(+)        | 94.6                | 86.5     | 88.6                | 66.1     | 76.5                | 55.3     |
| Nishio                 | NAFLD(+) vs. Cryptogenic            | 94.6                | 84.6     | 88.6                | 59.8     | 76.5                | 49.1     |
| Nishio                 | NAFLD(+) vs. ETOH                   | 94.6                | 95.2     | 88.6                | 78.3     | 76.5                | 50.6     |
| Mikuriya               | NAFLD(+) vs. HCV(+)                 | 100.0               | 88.6     | 76.1                | 71.6     | 75.9                | 51.0     |
| Su                     | NAFLD(+) vs. NAFLD(-)               | 94.6                | 97.3     | 79.3                | 86.5     | 57.8                | 75.6     |
| Wong                   | NAFLD(+) vs. HBV(+)                 | 73.3                | 81.5     | 46.4                | 63.1     | 28.1                | 50.8     |
| Wong                   | NAFLD(+) vs. HCV(+)                 | 73.3                | 74.1     | 46.4                | 43       | 28.1                | 25.4     |
| Wong                   | NAFLD(+) vs. ETOH                   | 73.3                | 68.8     | 46.4                | 43.2     | 28.1                | 21.2     |
| Tian                   | NAFLD(+) vs. HBV(+)                 | 96.3                | 82.9     | 82.7                | 62.3     | 63.0                | 49.8     |
| Kimura                 | NAFLD(+) vs. Cryptogenic            | 96.6                | 93.4     | 85.2                | 80.4     | 72.6                | 72.3     |
| Kimura                 | NAFLD(+) vs. ETOH                   | 96.6                | 93.4     | 85.2                | 70.9     | 72.6                | 47.5     |
| Koh                    | NAFLD(+) vs. NAFLD(-)               | 94.0                | 90.1     | 82.5                | 73.4     | 70.1                | 60.9     |
| Liang                  | NAFLD(+) vs. HBV(+) / HCV(+) / ETOH | 99.7                | 91.7     | 88.8                | 76.1     | 84.8                | 67.0     |
| Yoon                   | NAFLD(+) vs. NAFLD(-)               | 97.9                | 94.2     | 94.7                | 89.3     | 91.1                | 79.2     |

**Legend:** Nonalcoholic fatty liver disease (NAFLD), Viral hepatitis B (HBV), Viral hepatitis C (HCV), alcoholic liver disease (ETOH).

## Appendix S8



**Supplementary Table 9** Summary of the output of multivariable meta-regression analysis. The hazard ratios of the disease-free survival (DFS) and overall survival (OS) were the dependent variables adjusted for year of publication and prevalence of cirrhosis among patients with nonalcoholic fatty liver disease (NAFLD). The year of publication and the prevalence of cirrhosis among patients with NAFLD expressed as a percentage were entered as continuous variables.

| Outcome               | Covariate           | Coefficient | 95% Confidence Interval |         | P Value      |
|-----------------------|---------------------|-------------|-------------------------|---------|--------------|
|                       |                     |             | Lower                   | Upper   |              |
| Disease free survival | Intercept           | -70.297     | -192.824                | 52.229  | 0.260        |
|                       | Year of publication | 0.035       | -0.026                  | 0.095   | 0.263        |
|                       | Cirrhosis           | 0.007       | -0.003                  | 0.017   | 0.170        |
| Overall survival      | Intercept           | 157.429     | 13.640                  | 301.217 | <b>0.032</b> |
|                       | Year of publication | -0.078      | -0.149                  | -0.007  | <b>0.031</b> |
|                       | Cirrhosis           | -0.001      | -0.013                  | 0.011   | 0.841        |
